# Supplementary material for: Aerobic exercise improves lysosomal function in the brain of high cholesterol diet-fed APP/PS1 mice by modulating 27-hydroxycholesterol via the liver-brain axis
Source: Research Square preprint supplement (doi:10.21203/rs.3.rs-6361968/v1), 2025-05-09

Figure 4B (Liver)

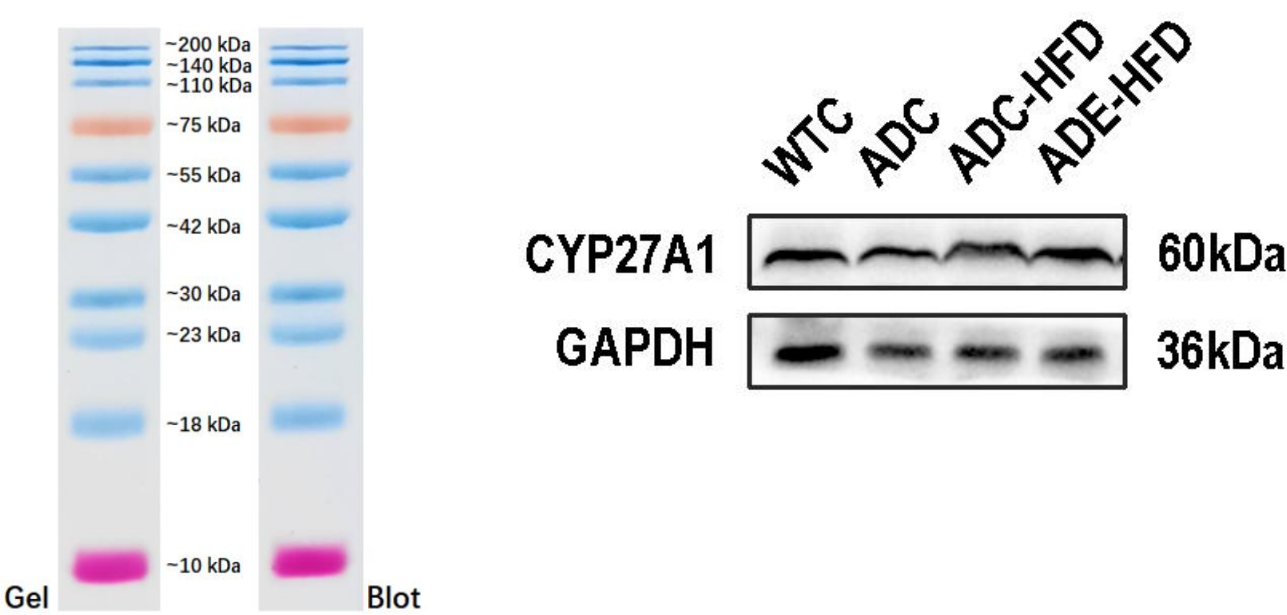

CYP27A1

GAPDH

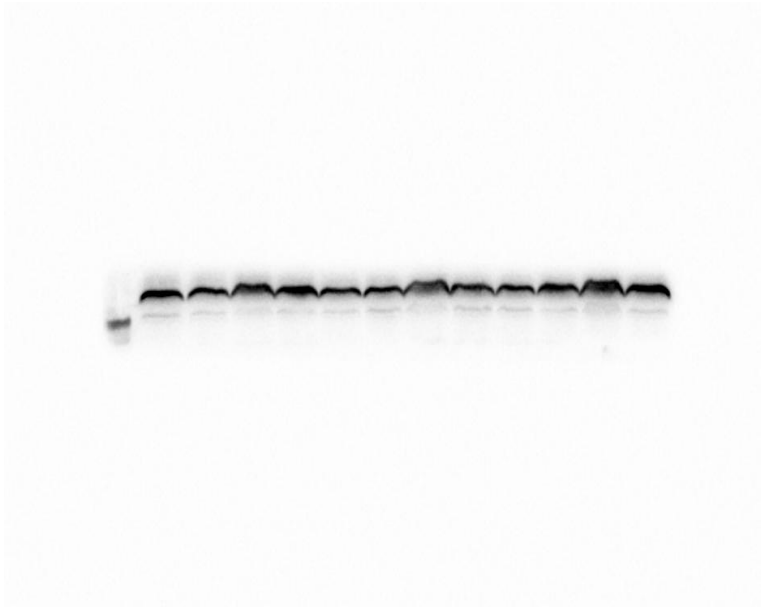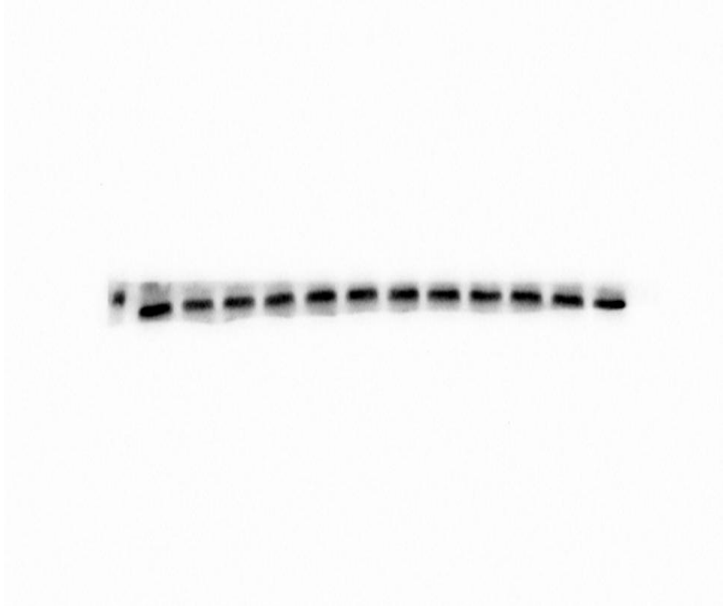

Figure 4D

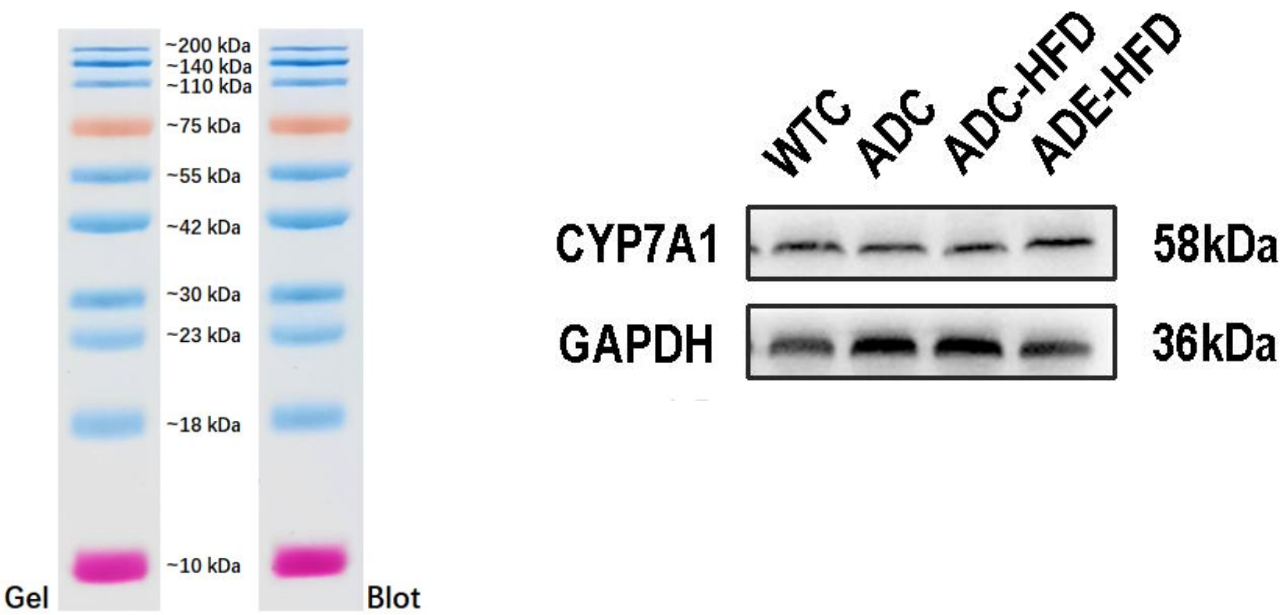

CYP7A1

GAPDH

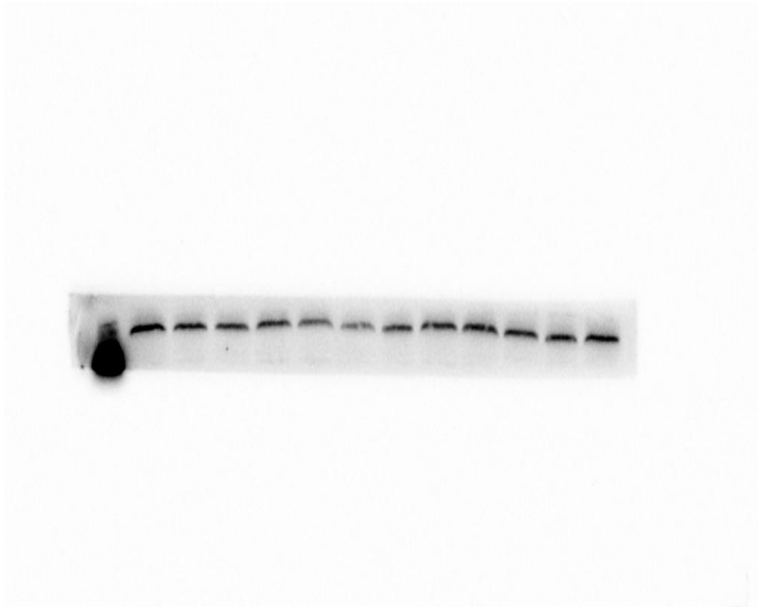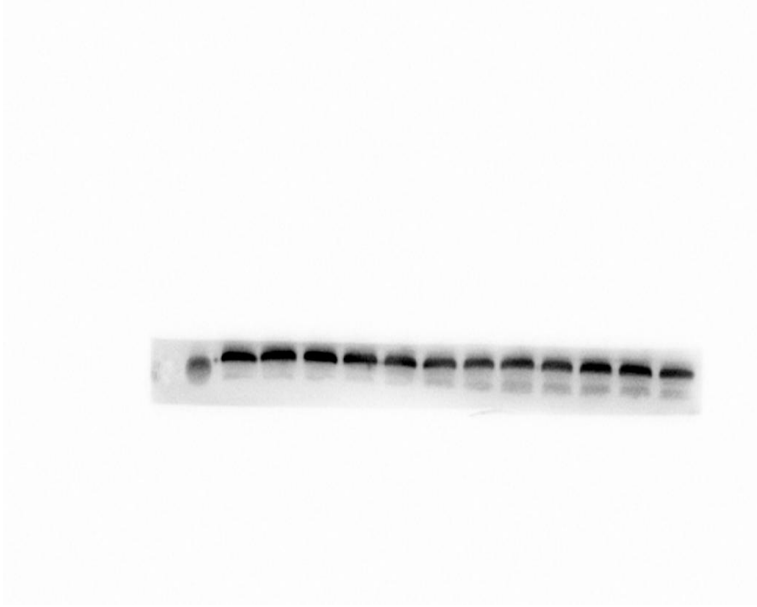

Figure 5A

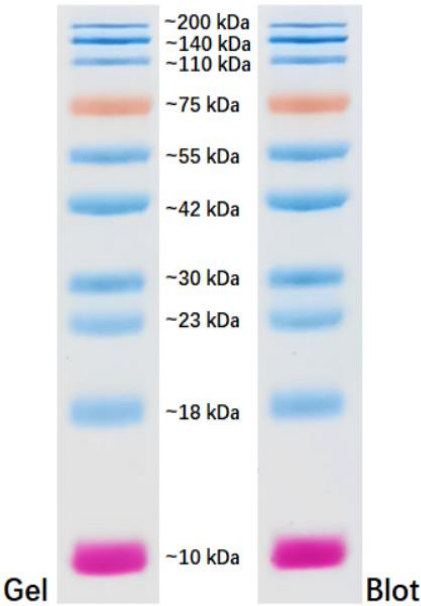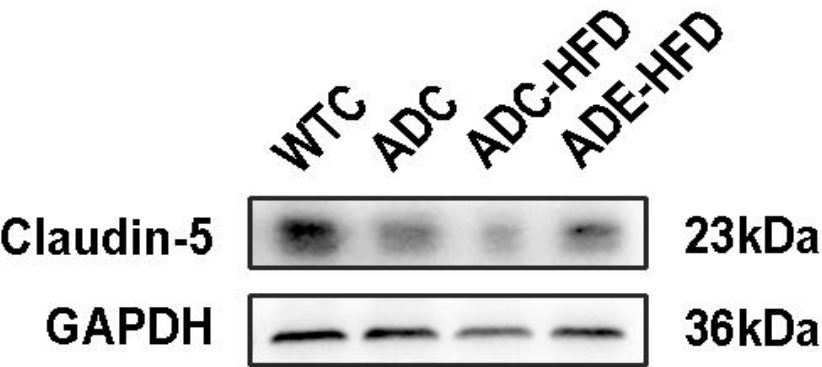

Claudin-5

GAPDH

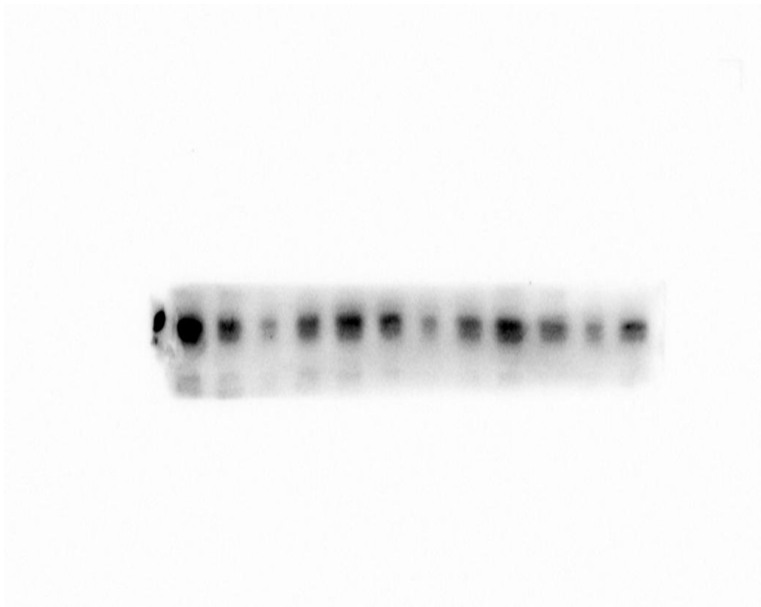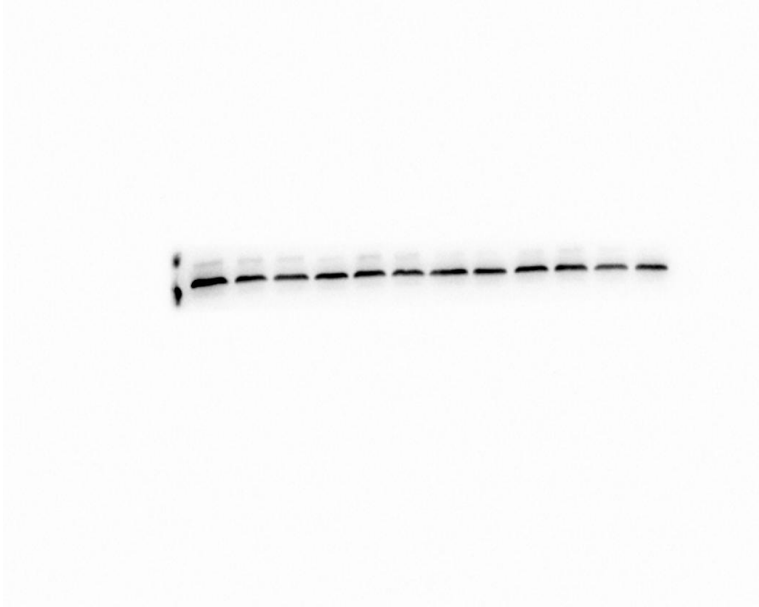

Figure 5B

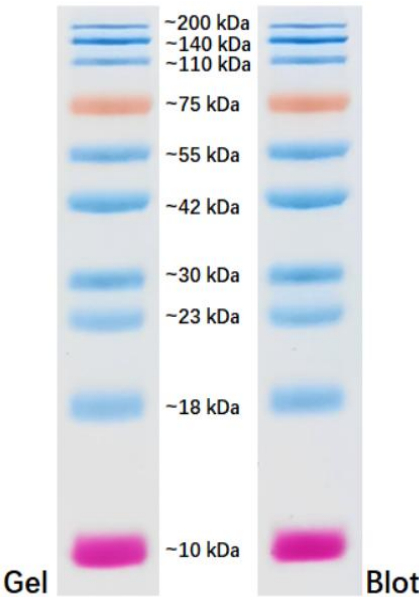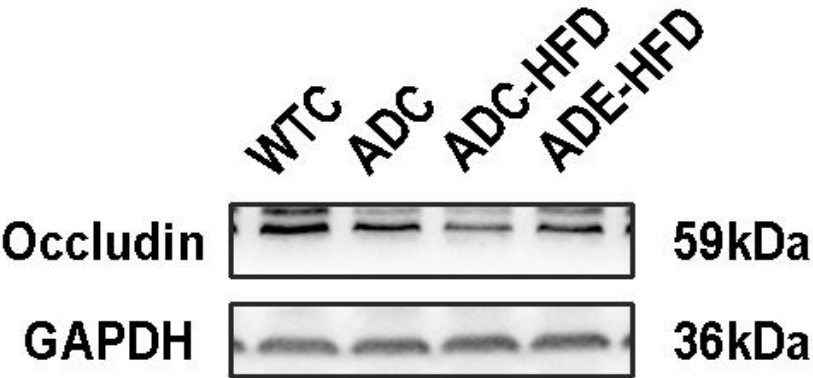

Occludin

GAPDH

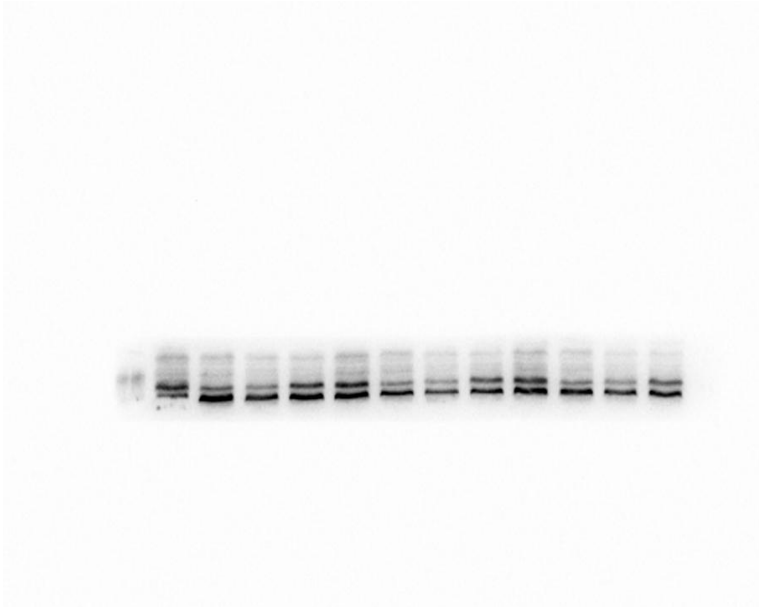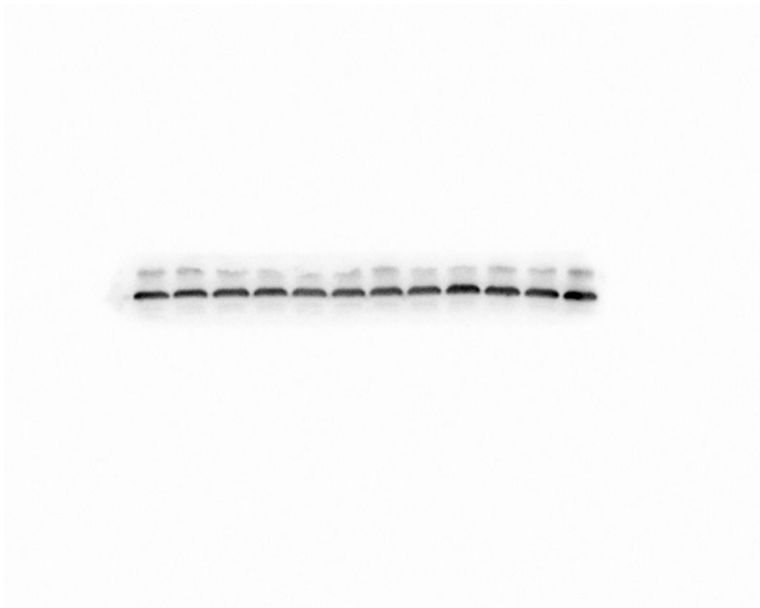

Figure 5C

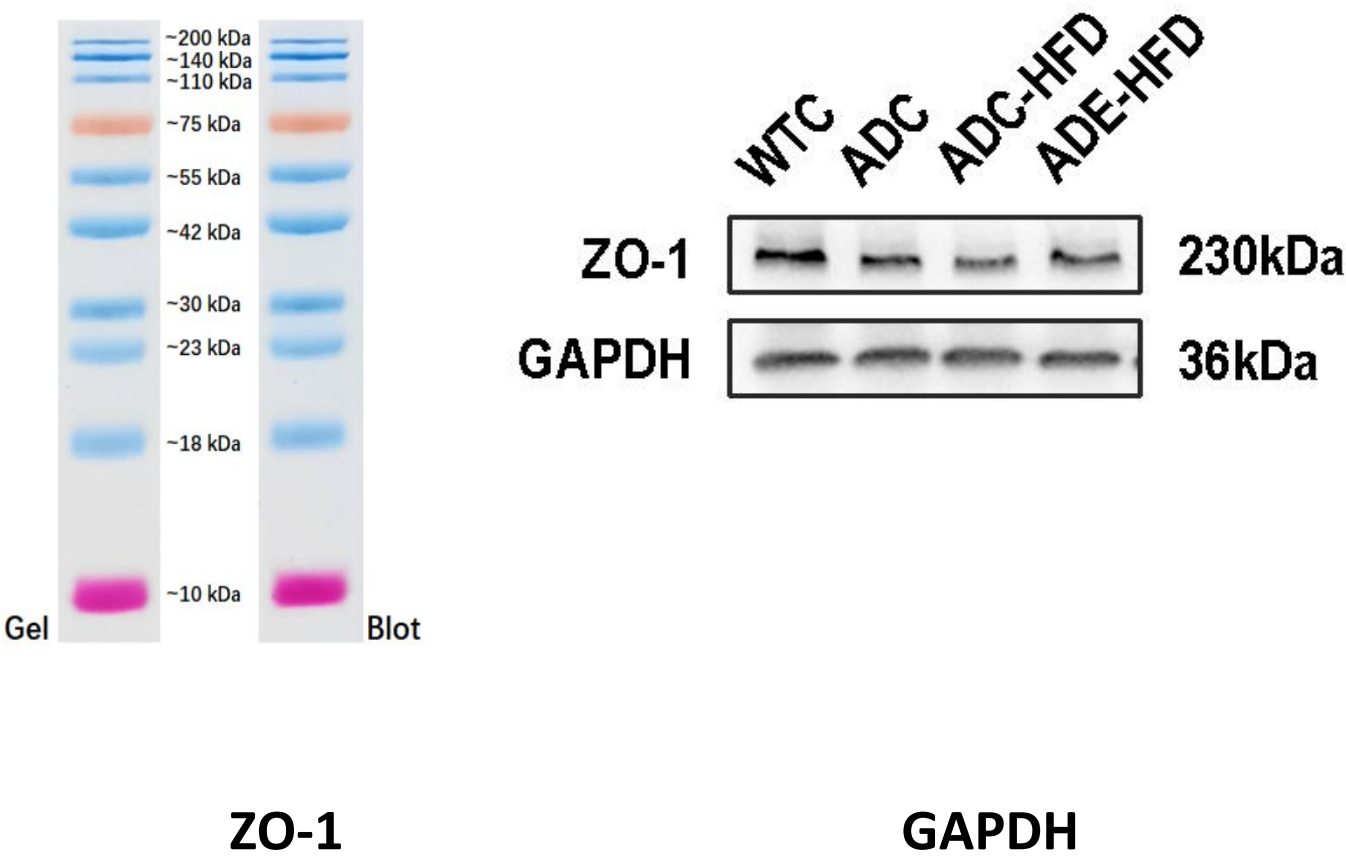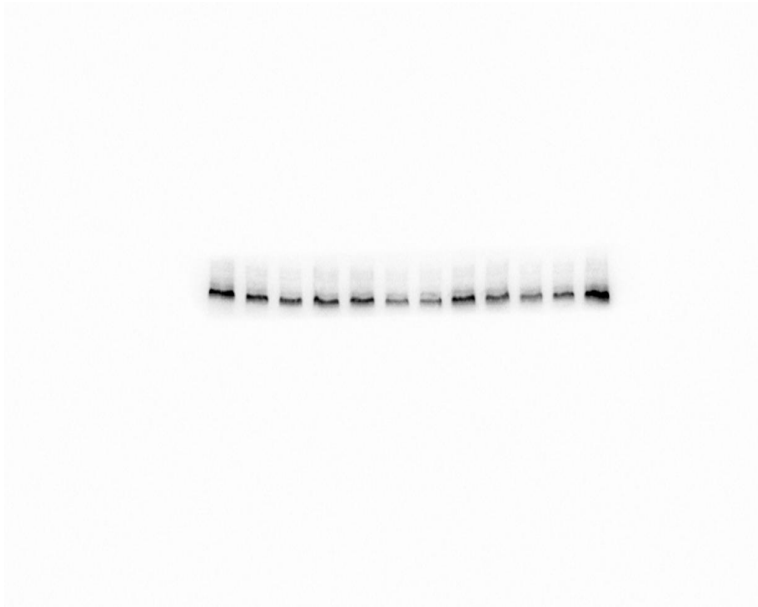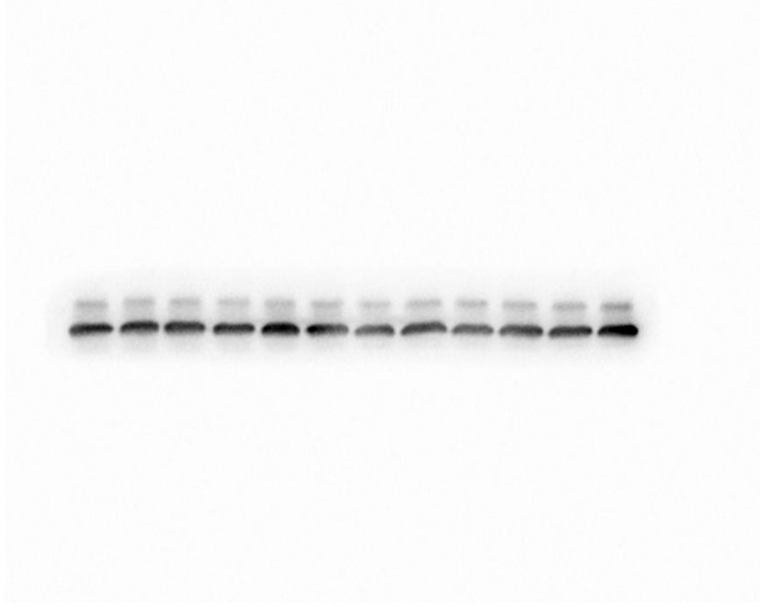

Figure 5E ( Brain )

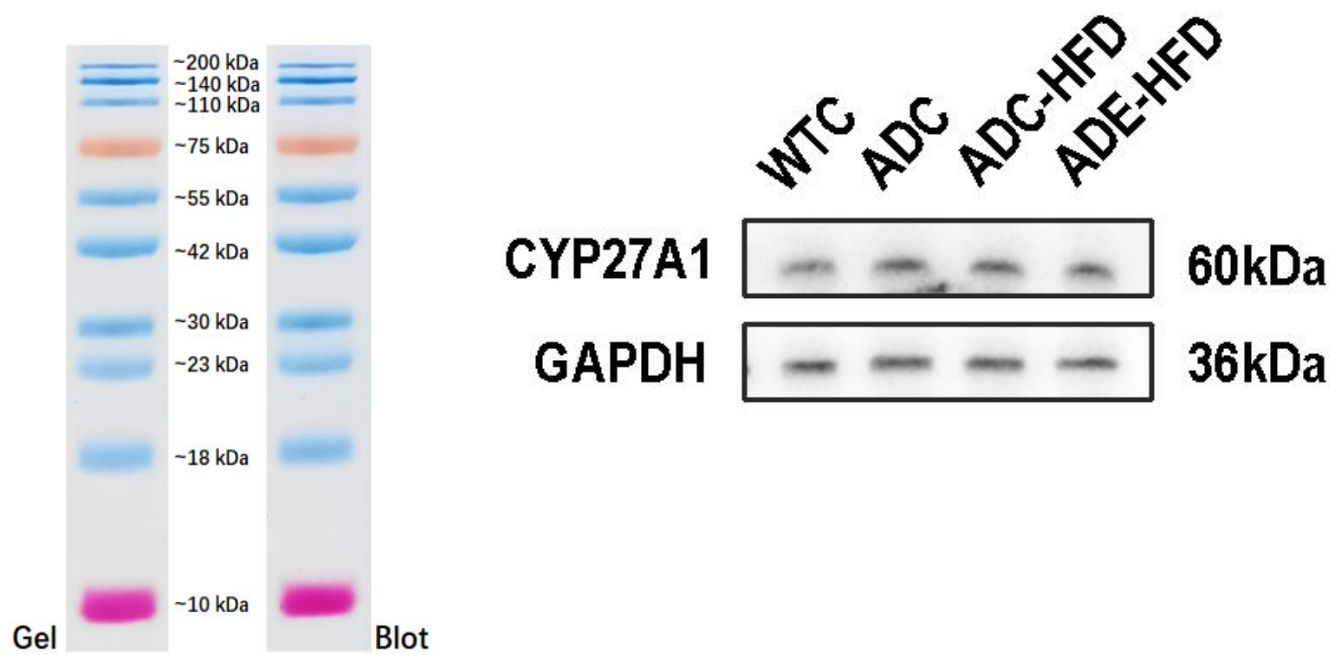

CYP27A1

GAPDH

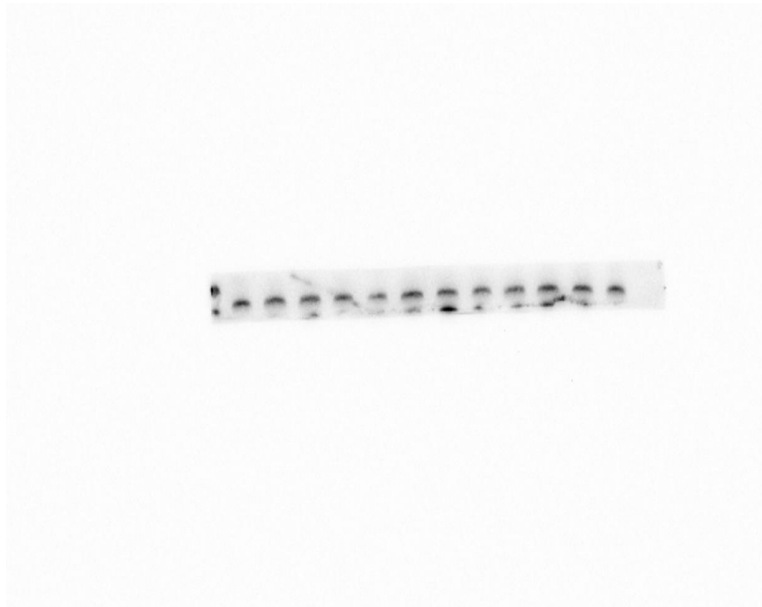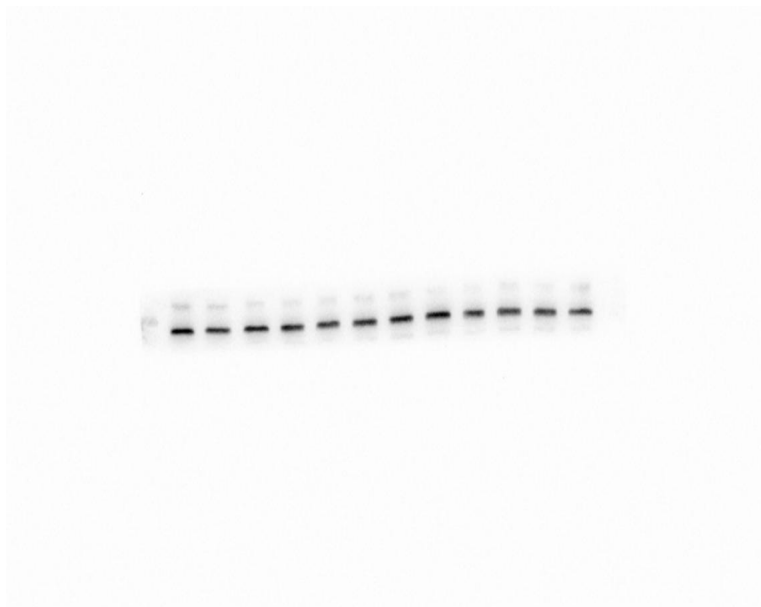

Figure 5F

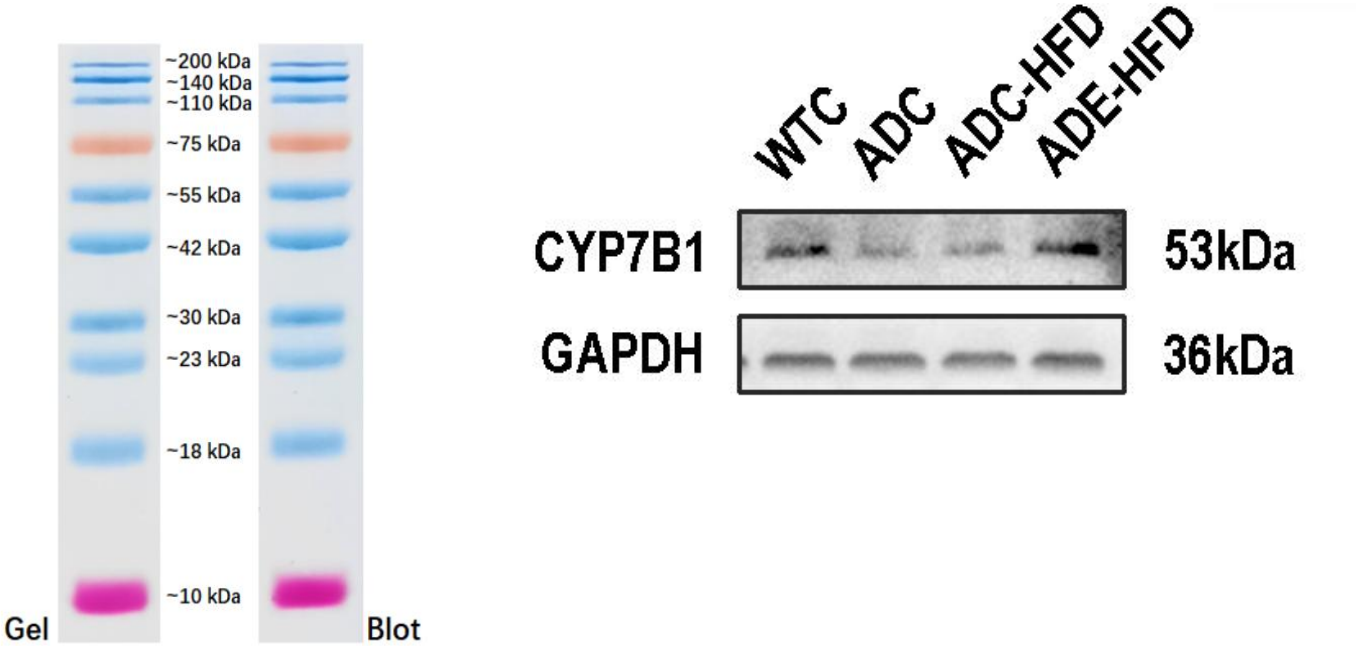

CYP7B1

GAPDH

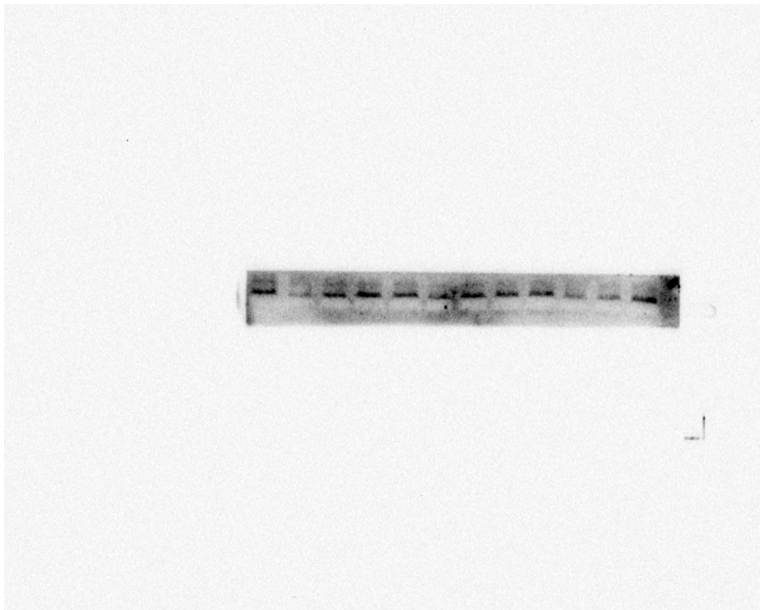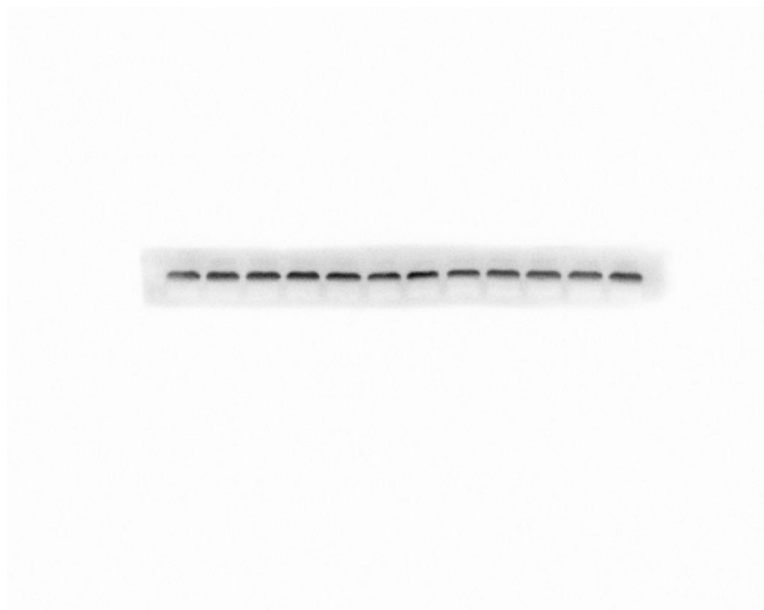

Figure 6B

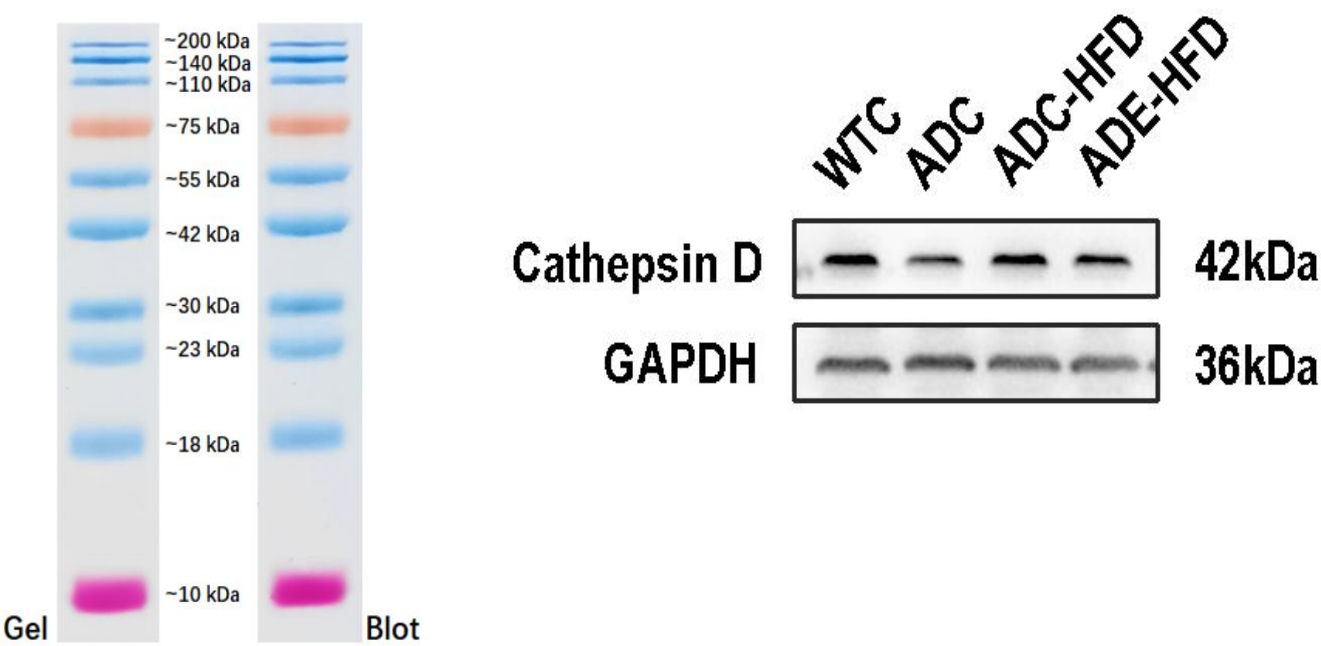

Cathepsin D

GAPDH

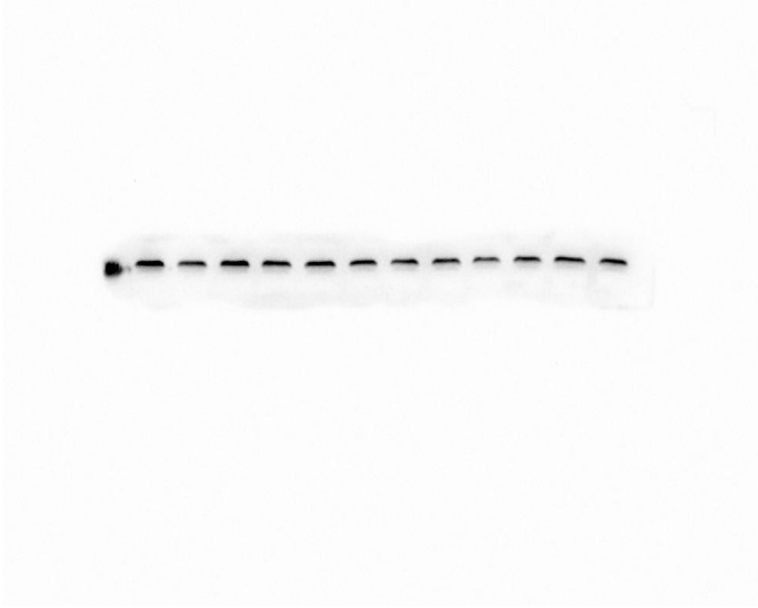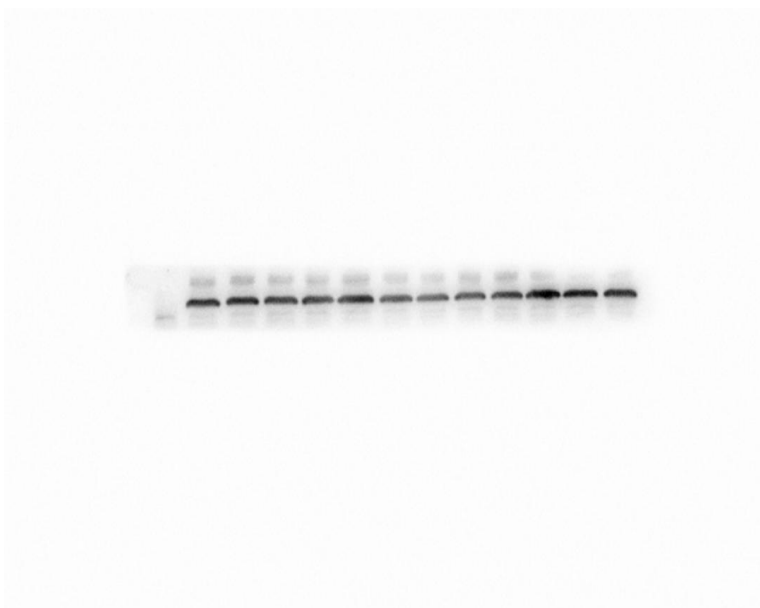

Figure 7A

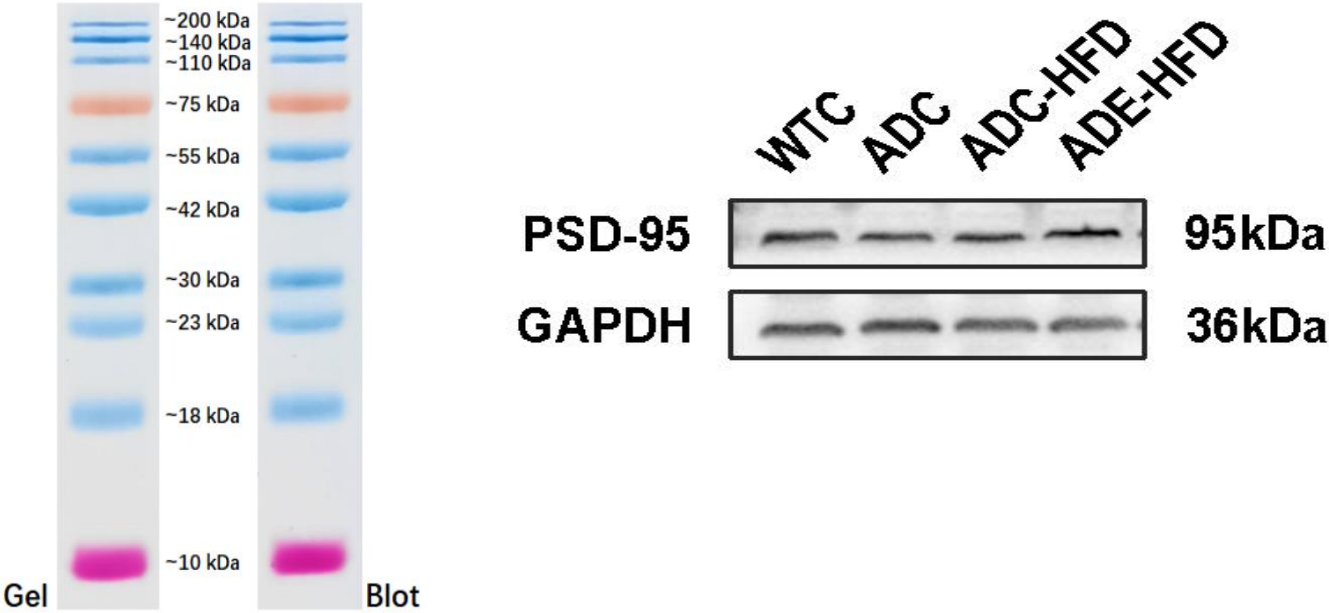

PSD-95

GAPDH

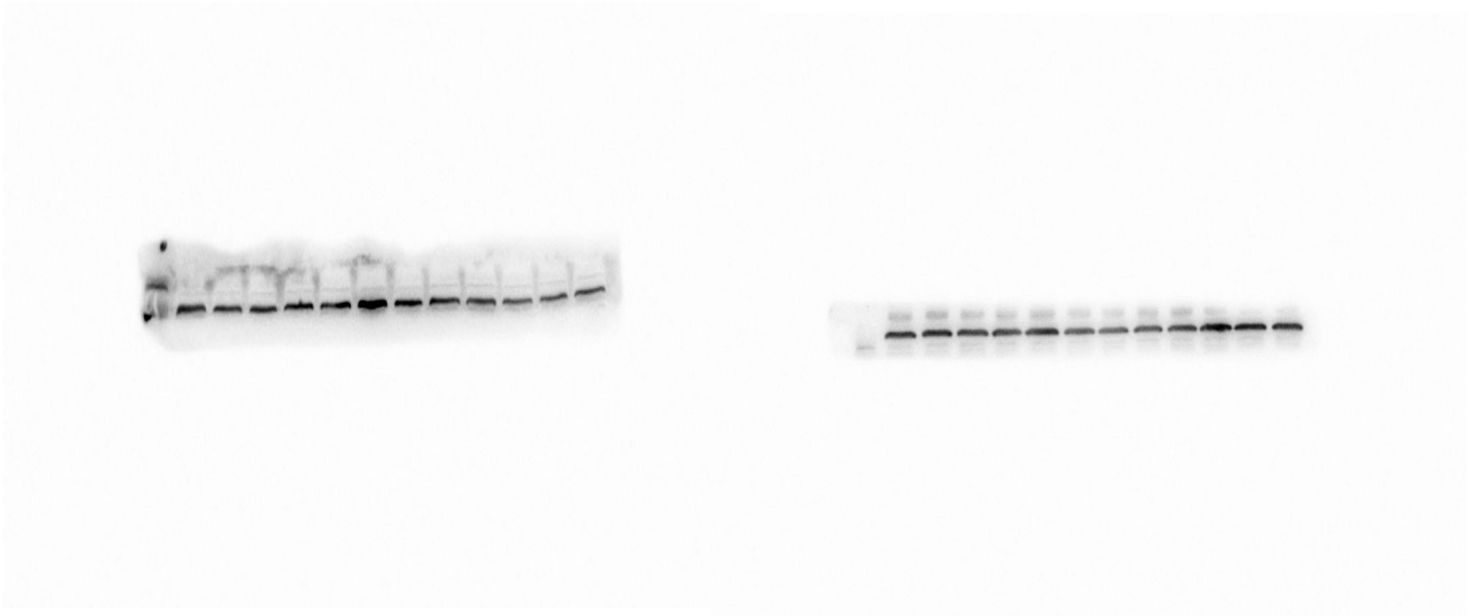

Figure 7B

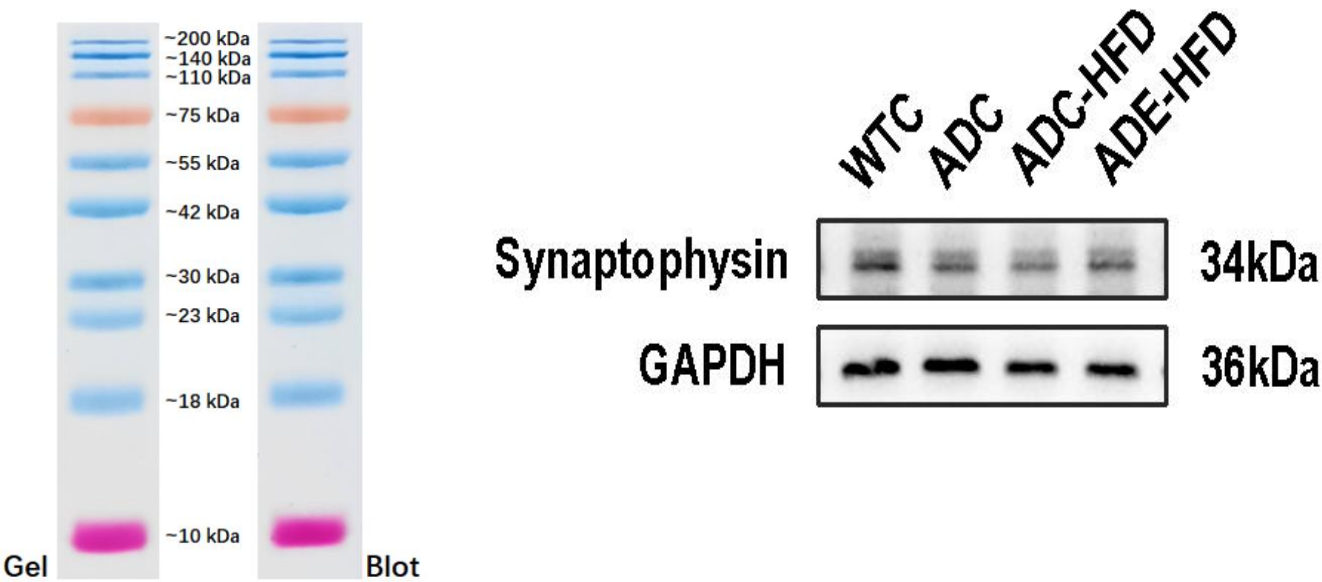

Synaptophysin

GAPDH

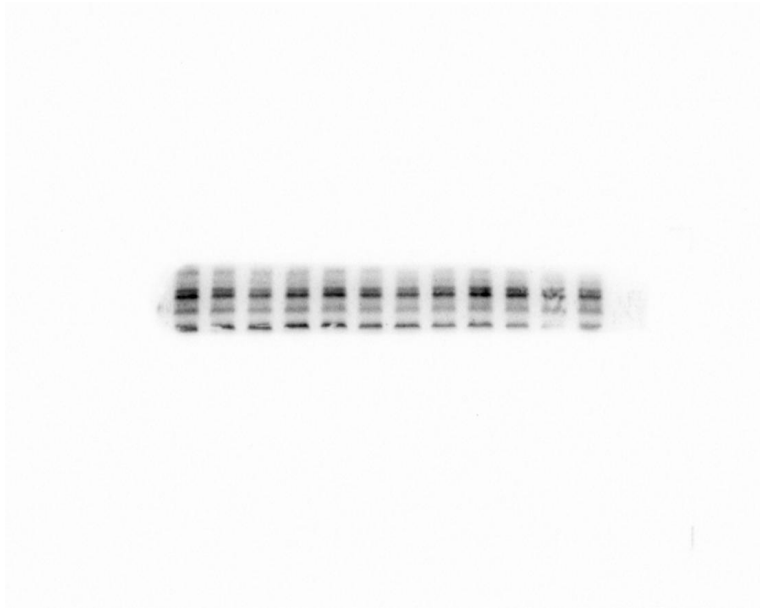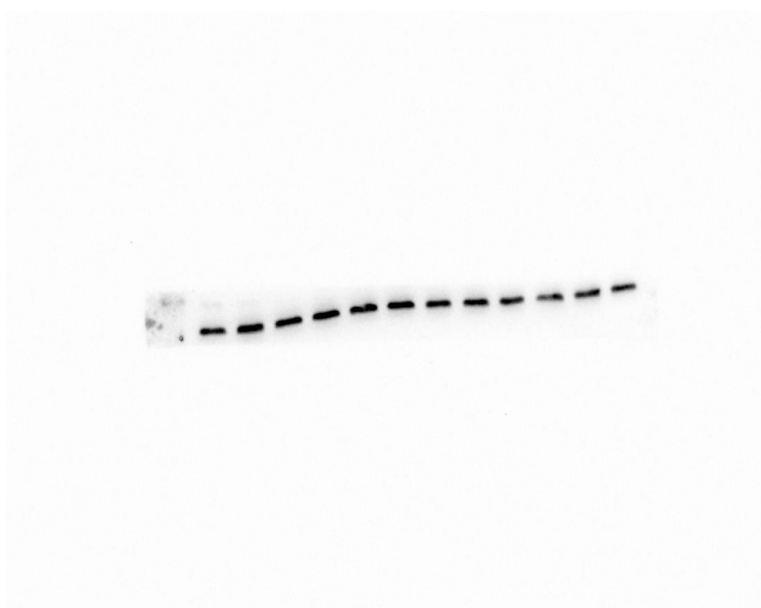

Figure 9A

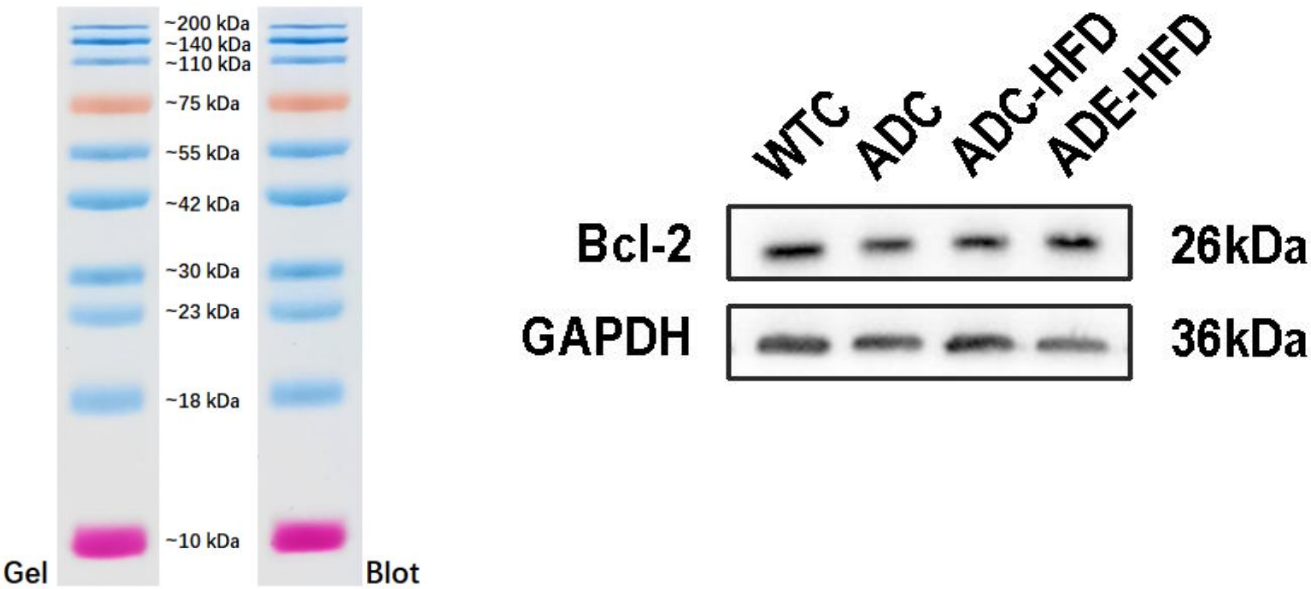

Bcl-2

GAPDH

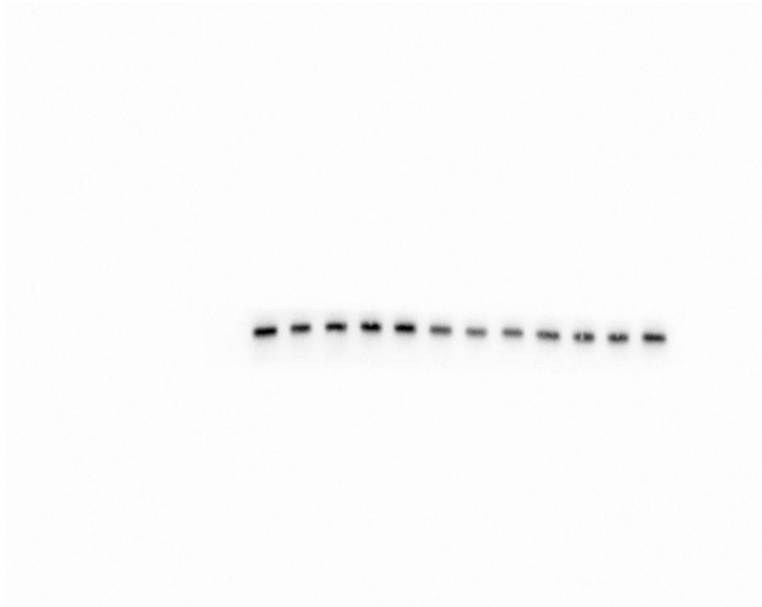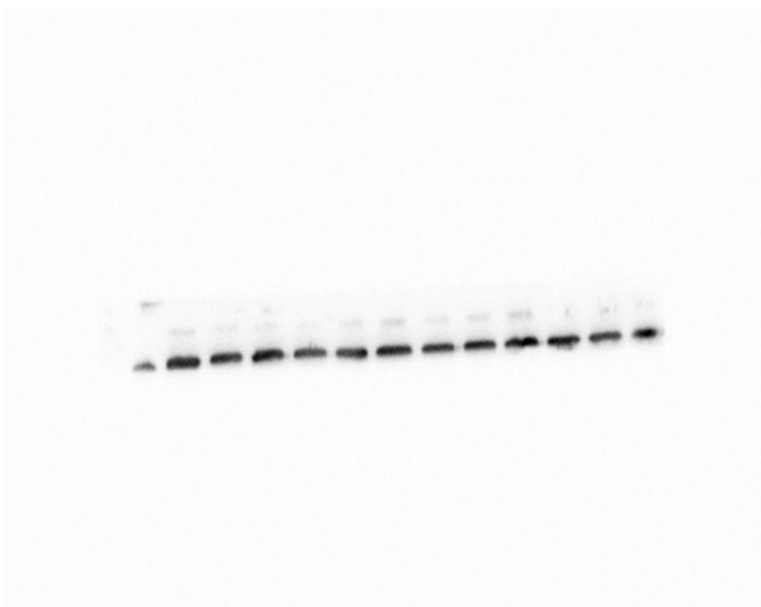

Figure 9B

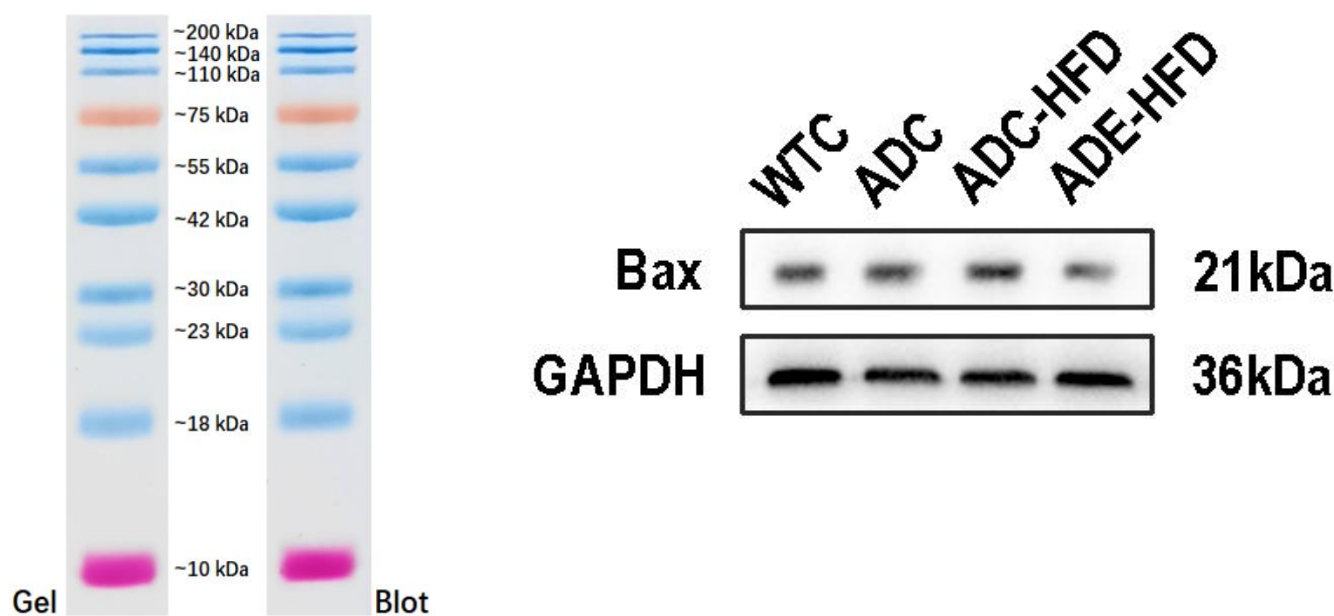

Bax

GAPDH

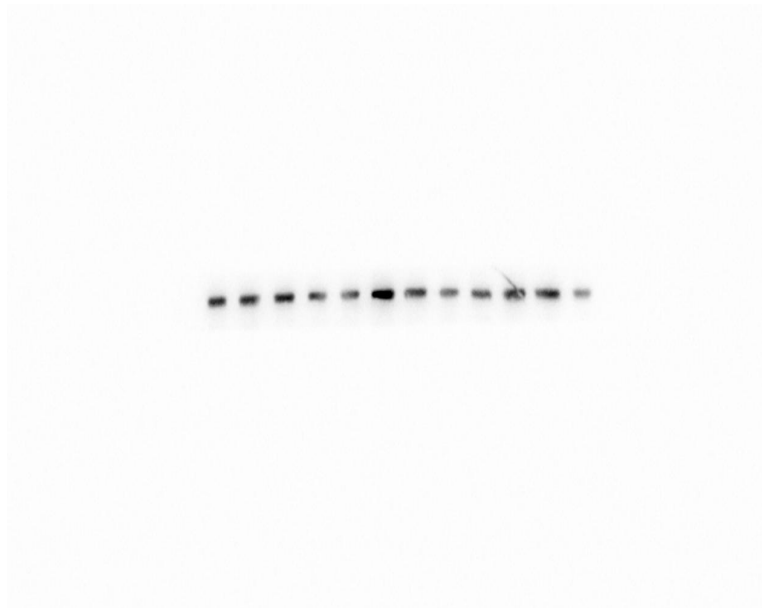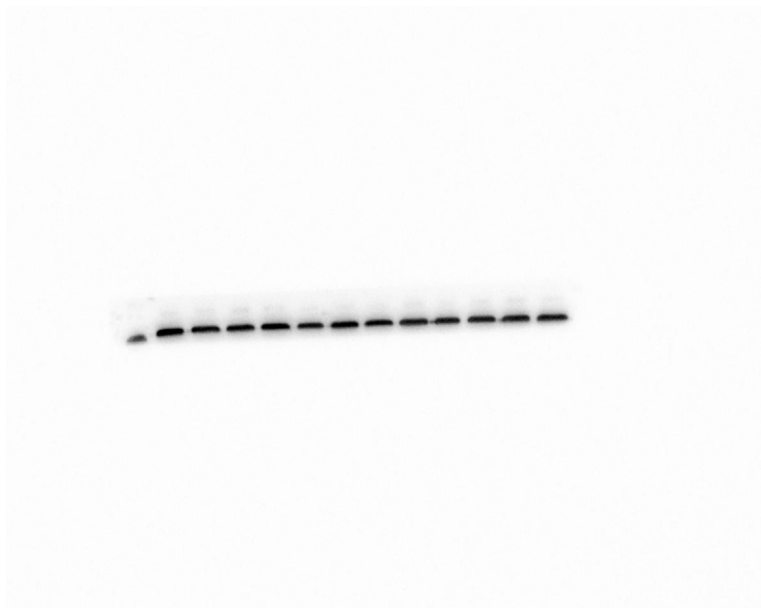

Supplement: Supplementary file 1 [file cbc6bfd0eba21a718c1a267f.pdf]
